# Supplementary material for: A Delphi study to explore and gain consensus regarding the most important barriers and facilitators affecting physiotherapist and pharmacist non-medical prescribing
Source: PubMed Central journal article supplement (PMC7853445; doi:10.1371/journal.pone.0246273), 2021-02-02
Supplement: pone.0246273.s003.pdf [file pone.0246273.s003.pdf]

# Delphi Round 2 - NMP

---

## Page 1: Introduction

Thank you for agreeing to participate in this study, which is to investigate barriers and facilitators to prescribing experienced by pharmacist and physiotherapist independent prescribers.

In this questionnaire you will be presented with various statements, developed from the responses to the last questionnaire that you participated in. Information in [ ] clarifies a statement, or makes it applicable to all areas of work and professions.

The statements have been divided into two sections; the first lists the various facilitators to non-medical prescribing that you have described, and the second lists the various barriers that you have also described. Each section comprises six tables of statements, grouped approximately by theme.

You will be asked to rate, using a simple scale, whether or not you agree that these are important factors. You will be able to add any comments you wish regarding each statement, such as elaborating on why you have chosen the rating you have given. You will also have the opportunity to add any further comments you may have.

- You will see a progress bar at the top of the page and this will indicate how far through the questionnaire you are.
- The questionnaire will take on average 30 minutes to complete but this may vary depending on how much you wish to write.
- You will be able to go back and forwards through the questionnaire if you need to.
- You will also be able to save the questionnaire and come back and finish it at a later time. To do this you will need to carefully follow the instructions that will be given at the time.

If you have any questions or comments please do not hesitate to contact me: Emma Graham-Clarke, email address: [EMG315@bham.ac.uk](mailto:EMG315@bham.ac.uk)

## Page 2: Rating of facilitators

1. Please rate the following facilitator statements for their importance to you and your prescribing practice. Please use the free text box to add any comments elaborating on your choice of rating for that statement. A **facilitator** is defined as something that has helped, or made it easier, for you to practice as a prescriber.

|                                                                                                                                                     | Rating * <i>Required</i> |                          |                          |                          |                          | <i>Free text comments</i> |
|-----------------------------------------------------------------------------------------------------------------------------------------------------|--------------------------|--------------------------|--------------------------|--------------------------|--------------------------|---------------------------|
|                                                                                                                                                     | Strongly disagree (1)    | Disagree (2)             | Neutral (3)              | Agree (4)                | Strongly agree (5)       |                           |
| Management support enables funding and training time to qualify as a prescriber                                                                     | <input type="checkbox"/> | <input type="checkbox"/> | <input type="checkbox"/> | <input type="checkbox"/> | <input type="checkbox"/> |                           |
| Manager prompting [me] to do the course and plan how to introduce it in the department.                                                             | <input type="checkbox"/> | <input type="checkbox"/> | <input type="checkbox"/> | <input type="checkbox"/> | <input type="checkbox"/> |                           |
| My employer has provided the support for me to be able to go on the NMP course and then supported me once qualified                                 | <input type="checkbox"/> | <input type="checkbox"/> | <input type="checkbox"/> | <input type="checkbox"/> | <input type="checkbox"/> |                           |
| My manager is keen to develop non-medical prescribers within the trust so is supportive of my role and helping me to negotiate a clinic slot again. | <input type="checkbox"/> | <input type="checkbox"/> | <input type="checkbox"/> | <input type="checkbox"/> | <input type="checkbox"/> |                           |
| Support from my line manager                                                                                                                        | <input type="checkbox"/> | <input type="checkbox"/> | <input type="checkbox"/> | <input type="checkbox"/> | <input type="checkbox"/> |                           |
| Support from the employer/department for the role of non-medical prescribers                                                                        | <input type="checkbox"/> | <input type="checkbox"/> | <input type="checkbox"/> | <input type="checkbox"/> | <input type="checkbox"/> |                           |
| The department created a role that allows me to utilise my skillset and supports me in the role                                                     | <input type="checkbox"/> | <input type="checkbox"/> | <input type="checkbox"/> | <input type="checkbox"/> | <input type="checkbox"/> |                           |

|                                                                                                                        |                          |                          |                          |                          |                          |  |
|------------------------------------------------------------------------------------------------------------------------|--------------------------|--------------------------|--------------------------|--------------------------|--------------------------|--|
| All patients rated the NMP experience as high and highly value their NMP prescribing as part of their care             | <input type="checkbox"/> | <input type="checkbox"/> | <input type="checkbox"/> | <input type="checkbox"/> | <input type="checkbox"/> |  |
| Patient requirements. A need for patient's to have streamlined care by being able to prescribe at the point of contact | <input type="checkbox"/> | <input type="checkbox"/> | <input type="checkbox"/> | <input type="checkbox"/> | <input type="checkbox"/> |  |
| Being able to prescribe to patients is more effective and really useful working [in my area]                           | <input type="checkbox"/> | <input type="checkbox"/> | <input type="checkbox"/> | <input type="checkbox"/> | <input type="checkbox"/> |  |
| Wide variety of options that you can offer patients to improve their experience                                        | <input type="checkbox"/> | <input type="checkbox"/> | <input type="checkbox"/> | <input type="checkbox"/> | <input type="checkbox"/> |  |
| Motivation to help the patients who will benefit with prescribing and cut care delay / duplication                     | <input type="checkbox"/> | <input type="checkbox"/> | <input type="checkbox"/> | <input type="checkbox"/> | <input type="checkbox"/> |  |

1.a. Would you change the wording of any of the above statements? If you would, please describe say what you would change in the following free text box.

2. Please rate the following facilitator statements for their importance to you and your prescribing practice. Please use the free text box to add any comments elaborating on your choice of rating for that statement. A **facilitator** is defined as something that has helped, or made it easier, for you to practice as a prescriber.

| Rating * Required     |              |             |           |                    | Free text comments |
|-----------------------|--------------|-------------|-----------|--------------------|--------------------|
| Strongly disagree (1) | Disagree (2) | Neutral (3) | Agree (4) | Strongly agree (5) |                    |
|                       |              |             |           |                    |                    |

|                                                                                                                                                     |                          |                          |                          |                          |                          |  |
|-----------------------------------------------------------------------------------------------------------------------------------------------------|--------------------------|--------------------------|--------------------------|--------------------------|--------------------------|--|
| Medical colleagues informed by my frequent prescribing habits and have begun prescribing common drugs I often start a patient on                    | <input type="checkbox"/> | <input type="checkbox"/> | <input type="checkbox"/> | <input type="checkbox"/> | <input type="checkbox"/> |  |
| Clinical supervision with a [doctor] has massively helped me increase my confidence prescribing                                                     | <input type="checkbox"/> | <input type="checkbox"/> | <input type="checkbox"/> | <input type="checkbox"/> | <input type="checkbox"/> |  |
| Direct contact with medical team caring for patient                                                                                                 | <input type="checkbox"/> | <input type="checkbox"/> | <input type="checkbox"/> | <input type="checkbox"/> | <input type="checkbox"/> |  |
| Doctors have been working [with] this [NMP] model                                                                                                   | <input type="checkbox"/> | <input type="checkbox"/> | <input type="checkbox"/> | <input type="checkbox"/> | <input type="checkbox"/> |  |
| Forward thinking DMP [designated medical practitioner] who is keen to integrate different MDG [multidisciplinary group] professionals into the team | <input type="checkbox"/> | <input type="checkbox"/> | <input type="checkbox"/> | <input type="checkbox"/> | <input type="checkbox"/> |  |
| Good relationship with consultants                                                                                                                  | <input type="checkbox"/> | <input type="checkbox"/> | <input type="checkbox"/> | <input type="checkbox"/> | <input type="checkbox"/> |  |
| Joint working / shadowing opportunities with the specialist prescribers or GPs                                                                      | <input type="checkbox"/> | <input type="checkbox"/> | <input type="checkbox"/> | <input type="checkbox"/> | <input type="checkbox"/> |  |

|                                             |                          |                          |                          |                          |                          |  |
|---------------------------------------------|--------------------------|--------------------------|--------------------------|--------------------------|--------------------------|--|
| Supportive medical supervision / mentorship | <input type="checkbox"/> | <input type="checkbox"/> | <input type="checkbox"/> | <input type="checkbox"/> | <input type="checkbox"/> |  |
| Supportive medical colleagues               | <input type="checkbox"/> | <input type="checkbox"/> | <input type="checkbox"/> | <input type="checkbox"/> | <input type="checkbox"/> |  |
| Supportive nursing colleagues               | <input type="checkbox"/> | <input type="checkbox"/> | <input type="checkbox"/> | <input type="checkbox"/> | <input type="checkbox"/> |  |

2.a. Would you change the wording of any of the above statements? If you would, please describe say what you would change in the following free text box.

3. Please rate the following facilitator statements for their importance to you and your prescribing practice. Please use the free text box to add any comments elaborating on your choice of rating for that statement. A **facilitator** is defined as something that has helped, or made it easier, for you to practice as a prescriber.

|                                                                                                   | Rating * Required        |                          |                          |                          |                          | Free text comments |
|---------------------------------------------------------------------------------------------------|--------------------------|--------------------------|--------------------------|--------------------------|--------------------------|--------------------|
|                                                                                                   | Strongly disagree (1)    | Disagree (2)             | Neutral (3)              | Agree (4)                | Strongly agree (5)       |                    |
| The nature of the role facilitates prescribing practice as part of the overall review of patients | <input type="checkbox"/> | <input type="checkbox"/> | <input type="checkbox"/> | <input type="checkbox"/> | <input type="checkbox"/> |                    |
| Mentor already NMP - creates a positive environment for NMP                                       | <input type="checkbox"/> | <input type="checkbox"/> | <input type="checkbox"/> | <input type="checkbox"/> | <input type="checkbox"/> |                    |
| Being a role model for others [of my profession] as the only in-patient NMP                       | <input type="checkbox"/> | <input type="checkbox"/> | <input type="checkbox"/> | <input type="checkbox"/> | <input type="checkbox"/> |                    |

|                                                                                                                 |                          |                          |                          |                          |                          |  |
|-----------------------------------------------------------------------------------------------------------------|--------------------------|--------------------------|--------------------------|--------------------------|--------------------------|--|
| My knowledge of medication                                                                                      | <input type="checkbox"/> | <input type="checkbox"/> | <input type="checkbox"/> | <input type="checkbox"/> | <input type="checkbox"/> |  |
| As an NMP I have much better knowledge of OTC [over the counter] medication and can advise patients accordingly | <input type="checkbox"/> | <input type="checkbox"/> | <input type="checkbox"/> | <input type="checkbox"/> | <input type="checkbox"/> |  |
| My experience working as alongside a consultant/[GP] for many years                                             | <input type="checkbox"/> | <input type="checkbox"/> | <input type="checkbox"/> | <input type="checkbox"/> | <input type="checkbox"/> |  |
| Having a speciality allows development of skills and knowledge                                                  | <input type="checkbox"/> | <input type="checkbox"/> | <input type="checkbox"/> | <input type="checkbox"/> | <input type="checkbox"/> |  |
| Evidence base from investigations                                                                               | <input type="checkbox"/> | <input type="checkbox"/> | <input type="checkbox"/> | <input type="checkbox"/> | <input type="checkbox"/> |  |
| Prescribing regularly in primary care, a most advantageous skill                                                | <input type="checkbox"/> | <input type="checkbox"/> | <input type="checkbox"/> | <input type="checkbox"/> | <input type="checkbox"/> |  |
| 30 years experience [giving confidence]                                                                         | <input type="checkbox"/> | <input type="checkbox"/> | <input type="checkbox"/> | <input type="checkbox"/> | <input type="checkbox"/> |  |
| Personal confidence in specialism                                                                               | <input type="checkbox"/> | <input type="checkbox"/> | <input type="checkbox"/> | <input type="checkbox"/> | <input type="checkbox"/> |  |

3.a. Would you change the wording of any of the above statements? If you would, please describe say what you would change in the following free text box.

4. Please rate the following facilitator statements for their importance to you and your prescribing practice. Please use the free text box to add any comments elaborating on your choice of rating for that statement. A **facilitator** is defined as something that has helped, or made it easier, for you to practice as a prescriber.

|                                                                                  | Rating * <i>Required</i> |                          |                          |                          |                          | <i>Free text comments</i> |
|----------------------------------------------------------------------------------|--------------------------|--------------------------|--------------------------|--------------------------|--------------------------|---------------------------|
|                                                                                  | Strongly disagree (1)    | Disagree (2)             | Neutral (3)              | Agree (4)                | Strongly agree (5)       |                           |
| Clinical Lead pushing the project forwards                                       | <input type="checkbox"/> | <input type="checkbox"/> | <input type="checkbox"/> | <input type="checkbox"/> | <input type="checkbox"/> |                           |
| Good NMP support group with regular meetings                                     | <input type="checkbox"/> | <input type="checkbox"/> | <input type="checkbox"/> | <input type="checkbox"/> | <input type="checkbox"/> |                           |
| Working as part of an MDT [multidisciplinary team] / interdisciplinary group     | <input type="checkbox"/> | <input type="checkbox"/> | <input type="checkbox"/> | <input type="checkbox"/> | <input type="checkbox"/> |                           |
| Nursing and medical staff very open to pharmacist NMP role                       | <input type="checkbox"/> | <input type="checkbox"/> | <input type="checkbox"/> | <input type="checkbox"/> | <input type="checkbox"/> |                           |
| Support from other NMPs                                                          | <input type="checkbox"/> | <input type="checkbox"/> | <input type="checkbox"/> | <input type="checkbox"/> | <input type="checkbox"/> |                           |
| When you see others doing, I think it gives you the confidence to do it yourself | <input type="checkbox"/> | <input type="checkbox"/> | <input type="checkbox"/> | <input type="checkbox"/> | <input type="checkbox"/> |                           |
| Well supported by team and they allow me to prescribe for their patients         | <input type="checkbox"/> | <input type="checkbox"/> | <input type="checkbox"/> | <input type="checkbox"/> | <input type="checkbox"/> |                           |

4.a. Would you change the wording of any of the above statements? If you would, please describe say what you would change in the following free text box.

5. Please rate the following facilitator statements for their importance to you and your prescribing practice. Please use the free text box to add any comments elaborating on your choice of rating for that statement. A **facilitator** is defined as something that has helped, or made it easier, for you to practice as a prescriber.

|                                                                                                                   | Rating * Required        |                          |                          |                          |                          | Free text comments |
|-------------------------------------------------------------------------------------------------------------------|--------------------------|--------------------------|--------------------------|--------------------------|--------------------------|--------------------|
|                                                                                                                   | Strongly disagree (1)    | Disagree (2)             | Neutral (3)              | Agree (4)                | Strongly agree (5)       |                    |
| Process for registering, getting prescription pads etc... in place                                                | <input type="checkbox"/> | <input type="checkbox"/> | <input type="checkbox"/> | <input type="checkbox"/> | <input type="checkbox"/> |                    |
| Room space available for clinics                                                                                  | <input type="checkbox"/> | <input type="checkbox"/> | <input type="checkbox"/> | <input type="checkbox"/> | <input type="checkbox"/> |                    |
| The law enables me to practice as an NMP                                                                          | <input type="checkbox"/> | <input type="checkbox"/> | <input type="checkbox"/> | <input type="checkbox"/> | <input type="checkbox"/> |                    |
| As an IP [independent prescriber] it has made doing steroid injections much easier as less paperwork is necessary | <input type="checkbox"/> | <input type="checkbox"/> | <input type="checkbox"/> | <input type="checkbox"/> | <input type="checkbox"/> |                    |



|                                                                                                                                           |                          |                          |                          |                          |                          |  |
|-------------------------------------------------------------------------------------------------------------------------------------------|--------------------------|--------------------------|--------------------------|--------------------------|--------------------------|--|
| As an IP [independent prescriber] it has made the process of steroid injections easier as I am able to mix medication                     | <input type="checkbox"/> | <input type="checkbox"/> | <input type="checkbox"/> | <input type="checkbox"/> | <input type="checkbox"/> |  |
| Electronic prescribing system allows an audit trail of my prescribing and pharmacists can easily access the prescriptions and verify them | <input type="checkbox"/> | <input type="checkbox"/> | <input type="checkbox"/> | <input type="checkbox"/> | <input type="checkbox"/> |  |
| Having an electronic patient record mean that I can use all patient data available to base my prescribing upon                            | <input type="checkbox"/> | <input type="checkbox"/> | <input type="checkbox"/> | <input type="checkbox"/> | <input type="checkbox"/> |  |
| I have a [prescribing] budget where I work                                                                                                | <input type="checkbox"/> | <input type="checkbox"/> | <input type="checkbox"/> | <input type="checkbox"/> | <input type="checkbox"/> |  |
| Lack of medical cover proves the need have an extra prescriber on the ward                                                                | <input type="checkbox"/> | <input type="checkbox"/> | <input type="checkbox"/> | <input type="checkbox"/> | <input type="checkbox"/> |  |
| Nurses are not yet prescribers                                                                                                            | <input type="checkbox"/> | <input type="checkbox"/> | <input type="checkbox"/> | <input type="checkbox"/> | <input type="checkbox"/> |  |

5.a. Would you change the wording of any of the above statements? If you would, please describe say what you would change in the following free text box.

6. Please rate the following facilitator statements for their importance to you and your prescribing practice. Please use the free text box to add any comments elaborating on your choice of rating for that statement. A **facilitator** is defined as something that has helped, or made it easier, for you to practice as a prescriber.

|                                                                                                       | Rating * <i>Required</i> |                          |                          |                          |                          | <i>Free text comments</i> |
|-------------------------------------------------------------------------------------------------------|--------------------------|--------------------------|--------------------------|--------------------------|--------------------------|---------------------------|
|                                                                                                       | Strongly disagree (1)    | Disagree (2)             | Neutral (3)              | Agree (4)                | Strongly agree (5)       |                           |
| Supportive pharmacy leadership allowing prescribing without insisting on a second check by pharmacist | <input type="checkbox"/> | <input type="checkbox"/> | <input type="checkbox"/> | <input type="checkbox"/> | <input type="checkbox"/> |                           |
| [Benefit of] NICE Guidelines                                                                          | <input type="checkbox"/> | <input type="checkbox"/> | <input type="checkbox"/> | <input type="checkbox"/> | <input type="checkbox"/> |                           |
| Great antibiotic guidelines in this trust/area                                                        | <input type="checkbox"/> | <input type="checkbox"/> | <input type="checkbox"/> | <input type="checkbox"/> | <input type="checkbox"/> |                           |
| Easy access to medication info                                                                        | <input type="checkbox"/> | <input type="checkbox"/> | <input type="checkbox"/> | <input type="checkbox"/> | <input type="checkbox"/> |                           |
| Supportive working environment [with NMP] policies in place                                           | <input type="checkbox"/> | <input type="checkbox"/> | <input type="checkbox"/> | <input type="checkbox"/> | <input type="checkbox"/> |                           |
| We are well supported with NMP training opportunities, including 2 full in-house training days a year | <input type="checkbox"/> | <input type="checkbox"/> | <input type="checkbox"/> | <input type="checkbox"/> | <input type="checkbox"/> |                           |

|                                                                                                                                        |                          |                          |                          |                          |                          |                      |
|----------------------------------------------------------------------------------------------------------------------------------------|--------------------------|--------------------------|--------------------------|--------------------------|--------------------------|----------------------|
| Effective personal development reviews                                                                                                 | <input type="checkbox"/> | <input type="checkbox"/> | <input type="checkbox"/> | <input type="checkbox"/> | <input type="checkbox"/> | <input type="text"/> |
| Ongoing mentorship [supports] CPD [continuing professional development] and keeping up to date with current medication regimes         | <input type="checkbox"/> | <input type="checkbox"/> | <input type="checkbox"/> | <input type="checkbox"/> | <input type="checkbox"/> | <input type="text"/> |
| Attendance of MDT [multidisciplinary team] meeting [as] patients are discussed allowing the prescription to be discussed with the team | <input type="checkbox"/> | <input type="checkbox"/> | <input type="checkbox"/> | <input type="checkbox"/> | <input type="checkbox"/> | <input type="text"/> |

6.a. Would you change the wording of any of the above statements? If you would, please describe say what you would change in the following free text box.

7. Do you feel that there are any facilitators that are missing? If there are, please add them to the following free text box.

### Page 3: Rating of barriers

8. Please rate the following barrier statements for their importance to you and your prescribing practice. Please use the free text box to add any comments elaborating on your choice of rating for that statement. A **barrier** is defined as something that has prevented, or made it difficult, for you to practice as a prescriber.

|                                                                                                                                                                 | Rating * Required        |                          |                          |                          |                          | Free text comments |
|-----------------------------------------------------------------------------------------------------------------------------------------------------------------|--------------------------|--------------------------|--------------------------|--------------------------|--------------------------|--------------------|
|                                                                                                                                                                 | Strongly disagree (1)    | Disagree (2)             | Neutral (3)              | Agree (4)                | Strongly agree (5)       |                    |
| I am starting a new service, without much peer/managerial support to set it up                                                                                  | <input type="checkbox"/> | <input type="checkbox"/> | <input type="checkbox"/> | <input type="checkbox"/> | <input type="checkbox"/> |                    |
| Managers not supporting prescribing role                                                                                                                        | <input type="checkbox"/> | <input type="checkbox"/> | <input type="checkbox"/> | <input type="checkbox"/> | <input type="checkbox"/> |                    |
| The department is not very supportive within the context of expanding my role and utilising the practical aspects of my prescribing such as patient examination | <input type="checkbox"/> | <input type="checkbox"/> | <input type="checkbox"/> | <input type="checkbox"/> | <input type="checkbox"/> |                    |
| Trust application process lengthy and still waiting to be allowed to prescribe. Director of nursing does not know me and has been reluctant to sign paperwork   | <input type="checkbox"/> | <input type="checkbox"/> | <input type="checkbox"/> | <input type="checkbox"/> | <input type="checkbox"/> |                    |
| [Lack of] acceptance as NMP by nurses                                                                                                                           | <input type="checkbox"/> | <input type="checkbox"/> | <input type="checkbox"/> | <input type="checkbox"/> | <input type="checkbox"/> |                    |

|                                                                                                                                                       |                          |                          |                          |                          |                          |  |
|-------------------------------------------------------------------------------------------------------------------------------------------------------|--------------------------|--------------------------|--------------------------|--------------------------|--------------------------|--|
| Pressure from ward to prescribe beyond my scope                                                                                                       | <input type="checkbox"/> | <input type="checkbox"/> | <input type="checkbox"/> | <input type="checkbox"/> | <input type="checkbox"/> |  |
| A lack of clinicians wanting to share their skills                                                                                                    | <input type="checkbox"/> | <input type="checkbox"/> | <input type="checkbox"/> | <input type="checkbox"/> | <input type="checkbox"/> |  |
| Colleagues may feel prescribing should only occur after all the usual duties have been completed                                                      | <input type="checkbox"/> | <input type="checkbox"/> | <input type="checkbox"/> | <input type="checkbox"/> | <input type="checkbox"/> |  |
| I have no other IP [independent prescriber] to chat things through with quickly & easily                                                              | <input type="checkbox"/> | <input type="checkbox"/> | <input type="checkbox"/> | <input type="checkbox"/> | <input type="checkbox"/> |  |
| Lack of staffing, so often conducting medicines reconciliation, which I am reluctant to prescribe from, and may not have time to go on the ward round | <input type="checkbox"/> | <input type="checkbox"/> | <input type="checkbox"/> | <input type="checkbox"/> | <input type="checkbox"/> |  |
| Sometimes junior clinicians feel an NMP is prescribing because their own prescribing is inadequate                                                    | <input type="checkbox"/> | <input type="checkbox"/> | <input type="checkbox"/> | <input type="checkbox"/> | <input type="checkbox"/> |  |

8.a. Would you change the wording of any of the above statements? If you would, please describe say what you would change in the following free text box.

9. Please rate the following barrier statements for their importance to you and your prescribing practice. Please use the free text box to add any comments elaborating on your choice of rating for that statement. A **barrier** is defined as something that has prevented, or made it difficult, for you to practice as a prescriber.

|                                                                                                                               | Rating * <i>Required</i> |                          |                          |                          |                          | <i>Free text comments</i> |
|-------------------------------------------------------------------------------------------------------------------------------|--------------------------|--------------------------|--------------------------|--------------------------|--------------------------|---------------------------|
|                                                                                                                               | Strongly disagree (1)    | Disagree (2)             | Neutral (3)              | Agree (4)                | Strongly agree (5)       |                           |
| [Medic] instead of increasing the dose may change the drug instead of discussing with me                                      | <input type="checkbox"/> | <input type="checkbox"/> | <input type="checkbox"/> | <input type="checkbox"/> | <input type="checkbox"/> |                           |
| Lack of acceptance by [medics]                                                                                                | <input type="checkbox"/> | <input type="checkbox"/> | <input type="checkbox"/> | <input type="checkbox"/> | <input type="checkbox"/> |                           |
| Lack of immediate medical advice/support                                                                                      | <input type="checkbox"/> | <input type="checkbox"/> | <input type="checkbox"/> | <input type="checkbox"/> | <input type="checkbox"/> |                           |
| Lack of suitable mentor/mentorship                                                                                            | <input type="checkbox"/> | <input type="checkbox"/> | <input type="checkbox"/> | <input type="checkbox"/> | <input type="checkbox"/> |                           |
| Non-attendance on clinical ward rounds as documentation of patient progress or clinical plan in notes not always clear        | <input type="checkbox"/> | <input type="checkbox"/> | <input type="checkbox"/> | <input type="checkbox"/> | <input type="checkbox"/> |                           |
| Community/lone working [as] we only ever see patients on our own, so I'm unable to gain advice from other sources immediately | <input type="checkbox"/> | <input type="checkbox"/> | <input type="checkbox"/> | <input type="checkbox"/> | <input type="checkbox"/> |                           |
| Poor integration between the community team and the hospital team                                                             | <input type="checkbox"/> | <input type="checkbox"/> | <input type="checkbox"/> | <input type="checkbox"/> | <input type="checkbox"/> |                           |

|                                                                                                                                                 |                          |                          |                          |                          |                          |  |
|-------------------------------------------------------------------------------------------------------------------------------------------------|--------------------------|--------------------------|--------------------------|--------------------------|--------------------------|--|
| Secondary care outpatient specialities should suggest course of action to the GP regarding medicines. (Clinical Pathways and Hospital Policies) | <input type="checkbox"/> | <input type="checkbox"/> | <input type="checkbox"/> | <input type="checkbox"/> | <input type="checkbox"/> |  |
| New ways of working from joining new team                                                                                                       | <input type="checkbox"/> | <input type="checkbox"/> | <input type="checkbox"/> | <input type="checkbox"/> | <input type="checkbox"/> |  |
| I am unable to access any shared medical records making prescribing very difficult                                                              | <input type="checkbox"/> | <input type="checkbox"/> | <input type="checkbox"/> | <input type="checkbox"/> | <input type="checkbox"/> |  |

9.a. Would you change the wording of any of the above statements? If you would, please describe say what you would change in the following free text box.

10. Please rate the following barrier statements for their importance to you and your prescribing practice. Please use the free text box to add any comments elaborating on your choice of rating for that statement. A **barrier** is defined as something that has prevented, or made it difficult, for you to practice as a prescriber.

|                                                                 | Rating * Required        |                          |                          |                          |                          | Free text comments |
|-----------------------------------------------------------------|--------------------------|--------------------------|--------------------------|--------------------------|--------------------------|--------------------|
|                                                                 | Strongly disagree (1)    | Disagree (2)             | Neutral (3)              | Agree (4)                | Strongly agree (5)       |                    |
| Lacking confidence as it is a new skill and not enough exposure | <input type="checkbox"/> | <input type="checkbox"/> | <input type="checkbox"/> | <input type="checkbox"/> | <input type="checkbox"/> |                    |

|                                                                                                                                                   |                          |                          |                          |                          |                          |  |
|---------------------------------------------------------------------------------------------------------------------------------------------------|--------------------------|--------------------------|--------------------------|--------------------------|--------------------------|--|
| My confidence. I do sometimes doubt my abilities and worry a great deal about the legal/professional implications of making an incorrect decision | <input type="checkbox"/> | <input type="checkbox"/> | <input type="checkbox"/> | <input type="checkbox"/> | <input type="checkbox"/> |  |
| Change in job role, [to one that] did not lend itself to prescribing                                                                              | <input type="checkbox"/> | <input type="checkbox"/> | <input type="checkbox"/> | <input type="checkbox"/> | <input type="checkbox"/> |  |
| Changed roles [and] I don't feel confident to prescribe in the area that I work in now                                                            | <input type="checkbox"/> | <input type="checkbox"/> | <input type="checkbox"/> | <input type="checkbox"/> | <input type="checkbox"/> |  |
| Due to change employment shortly where new post doesn't currently have prescribing for [my profession] in place                                   | <input type="checkbox"/> | <input type="checkbox"/> | <input type="checkbox"/> | <input type="checkbox"/> | <input type="checkbox"/> |  |
| NMP role not well established for [my profession]                                                                                                 | <input type="checkbox"/> | <input type="checkbox"/> | <input type="checkbox"/> | <input type="checkbox"/> | <input type="checkbox"/> |  |
| No identified prescribing role in current work area                                                                                               | <input type="checkbox"/> | <input type="checkbox"/> | <input type="checkbox"/> | <input type="checkbox"/> | <input type="checkbox"/> |  |
| There is no time to actively prescribe [in my current role]                                                                                       | <input type="checkbox"/> | <input type="checkbox"/> | <input type="checkbox"/> | <input type="checkbox"/> | <input type="checkbox"/> |  |
| [Lack of] a defined reason to prescribe                                                                                                           | <input type="checkbox"/> | <input type="checkbox"/> | <input type="checkbox"/> | <input type="checkbox"/> | <input type="checkbox"/> |  |
| Lack of clear requirements to what is competent                                                                                                   | <input type="checkbox"/> | <input type="checkbox"/> | <input type="checkbox"/> | <input type="checkbox"/> | <input type="checkbox"/> |  |



|                                                                                                                                                          |                          |                          |                          |                          |                          |  |
|----------------------------------------------------------------------------------------------------------------------------------------------------------|--------------------------|--------------------------|--------------------------|--------------------------|--------------------------|--|
| Formulary differences between Trust and APC/CCG [area prescribing committee/clinical commissioning group] make it difficult to know what I can prescribe | <input type="checkbox"/> | <input type="checkbox"/> | <input type="checkbox"/> | <input type="checkbox"/> | <input type="checkbox"/> |  |
|----------------------------------------------------------------------------------------------------------------------------------------------------------|--------------------------|--------------------------|--------------------------|--------------------------|--------------------------|--|

10.a. Would you change the wording of any of the above statements? If you would, please describe say what you would change in the following free text box.

11. Please rate the following barrier statements for their importance to you and your prescribing practice. Please use the free text box to add any comments elaborating on your choice of rating for that statement. A **barrier** is defined as something that has prevented, or made it difficult, for you to practice as a prescriber.

|                                                                                                                                                      | Rating * Required        |                          |                          |                          |                          | Free text comments |
|------------------------------------------------------------------------------------------------------------------------------------------------------|--------------------------|--------------------------|--------------------------|--------------------------|--------------------------|--------------------|
|                                                                                                                                                      | Strongly disagree (1)    | Disagree (2)             | Neutral (3)              | Agree (4)                | Strongly agree (5)       |                    |
| Keeping up with new research difficult                                                                                                               | <input type="checkbox"/> | <input type="checkbox"/> | <input type="checkbox"/> | <input type="checkbox"/> | <input type="checkbox"/> |                    |
| You've had to stop a particular drug, even though licensed for reason being prescribed, as CCG [clinical commissioning group] is following guideline | <input type="checkbox"/> | <input type="checkbox"/> | <input type="checkbox"/> | <input type="checkbox"/> | <input type="checkbox"/> |                    |
| Starting a new speciality with new medicines to learn about                                                                                          | <input type="checkbox"/> | <input type="checkbox"/> | <input type="checkbox"/> | <input type="checkbox"/> | <input type="checkbox"/> |                    |
| Lack of diagnostic skills makes primary prescribing more difficult                                                                                   | <input type="checkbox"/> | <input type="checkbox"/> | <input type="checkbox"/> | <input type="checkbox"/> | <input type="checkbox"/> |                    |

|                                                                                                                       |                          |                          |                          |                          |                          |  |
|-----------------------------------------------------------------------------------------------------------------------|--------------------------|--------------------------|--------------------------|--------------------------|--------------------------|--|
| Clinical examination skills. Only basics taught on the course - BP and pulse. This makes me apprehensive to prescribe | <input type="checkbox"/> | <input type="checkbox"/> | <input type="checkbox"/> | <input type="checkbox"/> | <input type="checkbox"/> |  |
| Lack of access to ongoing development out of Trust                                                                    | <input type="checkbox"/> | <input type="checkbox"/> | <input type="checkbox"/> | <input type="checkbox"/> | <input type="checkbox"/> |  |
| Lack of training structure within the department[/workplace]                                                          | <input type="checkbox"/> | <input type="checkbox"/> | <input type="checkbox"/> | <input type="checkbox"/> | <input type="checkbox"/> |  |
| Lack of communication from university following course completion                                                     | <input type="checkbox"/> | <input type="checkbox"/> | <input type="checkbox"/> | <input type="checkbox"/> | <input type="checkbox"/> |  |
| Lack of pharmacology exposure during undergraduate training                                                           | <input type="checkbox"/> | <input type="checkbox"/> | <input type="checkbox"/> | <input type="checkbox"/> | <input type="checkbox"/> |  |
| NMP course very primary care and nursing focussed                                                                     | <input type="checkbox"/> | <input type="checkbox"/> | <input type="checkbox"/> | <input type="checkbox"/> | <input type="checkbox"/> |  |
| Lack of clinic rooms                                                                                                  | <input type="checkbox"/> | <input type="checkbox"/> | <input type="checkbox"/> | <input type="checkbox"/> | <input type="checkbox"/> |  |
| Rely on external company to register NMPs, print pads etc... sometimes delays someone being able to prescribe         | <input type="checkbox"/> | <input type="checkbox"/> | <input type="checkbox"/> | <input type="checkbox"/> | <input type="checkbox"/> |  |

11.a. Would you change the wording of any of the above statements? If you would, please describe say what you would change in the following free text box.

12. Please rate the following barrier statements for their importance to you and your prescribing practice. Please use the free text box to add any comments elaborating on your choice of rating for that statement. A **barrier** is defined as something that has prevented, or made it difficult, for you to practice as a prescriber.

|                                                                                                                                                                            | Rating * <i>Required</i> |                          |                          |                          |                          | <i>Free text comments</i> |
|----------------------------------------------------------------------------------------------------------------------------------------------------------------------------|--------------------------|--------------------------|--------------------------|--------------------------|--------------------------|---------------------------|
|                                                                                                                                                                            | Strongly disagree (1)    | Disagree (2)             | Neutral (3)              | Agree (4)                | Strongly agree (5)       |                           |
| The availability of a pharmacist to clinically screen the prescriptions                                                                                                    | <input type="checkbox"/> | <input type="checkbox"/> | <input type="checkbox"/> | <input type="checkbox"/> | <input type="checkbox"/> |                           |
| [My] prescribing not reviewed by pharmacists in the same way as medic or other NMPs prescribing                                                                            | <input type="checkbox"/> | <input type="checkbox"/> | <input type="checkbox"/> | <input type="checkbox"/> | <input type="checkbox"/> |                           |
| Variable access to patient records. I would not be happy to prescribe when I did not have access to patient record with up to date medication/allergies etc.               | <input type="checkbox"/> | <input type="checkbox"/> | <input type="checkbox"/> | <input type="checkbox"/> | <input type="checkbox"/> |                           |
| Unable to access patient's full SCR [summary care records] / GP records                                                                                                    | <input type="checkbox"/> | <input type="checkbox"/> | <input type="checkbox"/> | <input type="checkbox"/> | <input type="checkbox"/> |                           |
| [Unable to prescribe certain drugs and have to use] supplementary prescribing, [which] requires a slight change to the pathway of the team and doctors need to be educated | <input type="checkbox"/> | <input type="checkbox"/> | <input type="checkbox"/> | <input type="checkbox"/> | <input type="checkbox"/> |                           |
| Cost of professional indemnity                                                                                                                                             | <input type="checkbox"/> | <input type="checkbox"/> | <input type="checkbox"/> | <input type="checkbox"/> | <input type="checkbox"/> |                           |
| Lack of medical cover at times means I cannot prescribe opioids                                                                                                            | <input type="checkbox"/> | <input type="checkbox"/> | <input type="checkbox"/> | <input type="checkbox"/> | <input type="checkbox"/> |                           |

|                                                                                                                   |                          |                          |                          |                          |                          |  |
|-------------------------------------------------------------------------------------------------------------------|--------------------------|--------------------------|--------------------------|--------------------------|--------------------------|--|
| Limitations of [legal] prescribing guidelines [with a disparity between practitioner roles]                       | <input type="checkbox"/> | <input type="checkbox"/> | <input type="checkbox"/> | <input type="checkbox"/> | <input type="checkbox"/> |  |
| Professional indemnity is a challenge to acquire - need updated JD [job description] and employer slow to produce | <input type="checkbox"/> | <input type="checkbox"/> | <input type="checkbox"/> | <input type="checkbox"/> | <input type="checkbox"/> |  |
| Skills learnt during NMP course cannot be put into practice until [professional] registration which took 2 months | <input type="checkbox"/> | <input type="checkbox"/> | <input type="checkbox"/> | <input type="checkbox"/> | <input type="checkbox"/> |  |
| Unable to prescribe [certain drugs] and have to ask a [doctor] to do this                                         | <input type="checkbox"/> | <input type="checkbox"/> | <input type="checkbox"/> | <input type="checkbox"/> | <input type="checkbox"/> |  |

12.a. Would you change the wording of any of the above statements? If you would, please describe say what you would change in the following free text box.

13. Please rate the following barrier statements for their importance to you and your prescribing practice. Please use the free text box to add any comments elaborating on your choice of rating for that statement. A **barrier** is defined as something that has prevented, or made it difficult, for you to practice as a prescriber.

|                                                     | Rating * Required        |                          |                          |                          |                          | Free text comments |
|-----------------------------------------------------|--------------------------|--------------------------|--------------------------|--------------------------|--------------------------|--------------------|
|                                                     | Strongly disagree (1)    | Disagree (2)             | Neutral (3)              | Agree (4)                | Strongly agree (5)       |                    |
| NMP in clinic is not recognised as not commissioned | <input type="checkbox"/> | <input type="checkbox"/> | <input type="checkbox"/> | <input type="checkbox"/> | <input type="checkbox"/> |                    |

|                                                                                                                                                       |                          |                          |                          |                          |                          |  |
|-------------------------------------------------------------------------------------------------------------------------------------------------------|--------------------------|--------------------------|--------------------------|--------------------------|--------------------------|--|
| [Lack of] Funding for time spent prescribing                                                                                                          | <input type="checkbox"/> | <input type="checkbox"/> | <input type="checkbox"/> | <input type="checkbox"/> | <input type="checkbox"/> |  |
| Gaining permission for pilot and initial funding for clinics                                                                                          | <input type="checkbox"/> | <input type="checkbox"/> | <input type="checkbox"/> | <input type="checkbox"/> | <input type="checkbox"/> |  |
| Lack of organisational funding                                                                                                                        | <input type="checkbox"/> | <input type="checkbox"/> | <input type="checkbox"/> | <input type="checkbox"/> | <input type="checkbox"/> |  |
| No money to pay for staff going on any courses. However there seems to be a disparity as nurses in acute care appear to be able to access MSc modules | <input type="checkbox"/> | <input type="checkbox"/> | <input type="checkbox"/> | <input type="checkbox"/> | <input type="checkbox"/> |  |
| Nurses are cheaper                                                                                                                                    | <input type="checkbox"/> | <input type="checkbox"/> | <input type="checkbox"/> | <input type="checkbox"/> | <input type="checkbox"/> |  |
| Nurse led clinic introducing nurse prescribers so no need for other prescribers                                                                       | <input type="checkbox"/> | <input type="checkbox"/> | <input type="checkbox"/> | <input type="checkbox"/> | <input type="checkbox"/> |  |
| There is no current budget for prescribing                                                                                                            | <input type="checkbox"/> | <input type="checkbox"/> | <input type="checkbox"/> | <input type="checkbox"/> | <input type="checkbox"/> |  |

|                                                                                                                                                                    |                          |                          |                          |                          |                          |                                                                         |
|--------------------------------------------------------------------------------------------------------------------------------------------------------------------|--------------------------|--------------------------|--------------------------|--------------------------|--------------------------|-------------------------------------------------------------------------|
| <p>[Lack of time] time available for prescribing activities. Facilitating attendance on ward round to allow full patient history and inpatient episode history</p> | <input type="checkbox"/> | <input type="checkbox"/> | <input type="checkbox"/> | <input type="checkbox"/> | <input type="checkbox"/> | <div style="border: 1px solid black; height: 50px; width: 100%;"></div> |
| <p>[Lack of] time to specialise</p>                                                                                                                                | <input type="checkbox"/> | <input type="checkbox"/> | <input type="checkbox"/> | <input type="checkbox"/> | <input type="checkbox"/> | <div style="border: 1px solid black; height: 50px; width: 100%;"></div> |
| <p>Lack of allotted time resulting from new management role</p>                                                                                                    | <input type="checkbox"/> | <input type="checkbox"/> | <input type="checkbox"/> | <input type="checkbox"/> | <input type="checkbox"/> | <div style="border: 1px solid black; height: 50px; width: 100%;"></div> |
| <p>Lack of time to develop further prescribing skills</p>                                                                                                          | <input type="checkbox"/> | <input type="checkbox"/> | <input type="checkbox"/> | <input type="checkbox"/> | <input type="checkbox"/> | <div style="border: 1px solid black; height: 50px; width: 100%;"></div> |
| <p>Lack of time to prescribe as core/clinical duties take priority</p>                                                                                             | <input type="checkbox"/> | <input type="checkbox"/> | <input type="checkbox"/> | <input type="checkbox"/> | <input type="checkbox"/> | <div style="border: 1px solid black; height: 50px; width: 100%;"></div> |

13.a. Would you change the wording of any of the above statements? If you would, please describe say what you would change in the following free text box.

14. Do you feel that there are any barriers that are missing? If there are, please add them to the following free text box.

## Page 4: Next Steps

15. Do you have any comments about completing this questionnaire, such as ease of completion?

The next steps:

All the responses from the questionnaire will be analysed, and some simple statistics calculated.

You will then be sent a link to a new questionnaire, which will enable you to compare your rating with the average panel result. If you wish to amend your response you will be able to do this. You will also be asked to rank the facilitators and barriers in order of importance.

The next questionnaire will be sent out in approximately six weeks from: 07/18

## Page 5: Thank you

Thank you for completing this questionnaire.

If you have any questions or comments please do not hesitate to contact the lead researcher: Emma Graham-Clarke, email address:

[EMG315@bham.ac.uk](mailto:EMG315@bham.ac.uk)

---
